# Supplementary material for: On the involvement of NHC carbenes in catalytic reactions by iridium complexes, nanoparticle and bulk metal dispersed in imidazolium ionic liquids
Source: Royal Society of Chemistry journal article supplement (doi:10.1039/b707888a), 2007-01-01
Supplement: b707888a.pdf [file b707888a.pdf]

**Supporting Information for:**

**On the Involvement of NHC Carbenes in Catalytic Reactions by  
Iridium Complexes, Nanoparticle and Bulk Metal Dispersed in  
Imidazolium Ionic Liquids**

*Jackson D. Scholten,<sup>a</sup> Günter Ebeling<sup>a</sup> and Jairton Dupont<sup>\*a</sup>*

<sup>a</sup>Laboratory of Molecular Catalysis, Instituto de Química-UFRGS, 9500 P.O. Box 15003, 91501-970, Porto Alegre, RS Brazil – E-mail: dupont@iq.ufrgs.br – Fax: 55 51 3308 7304

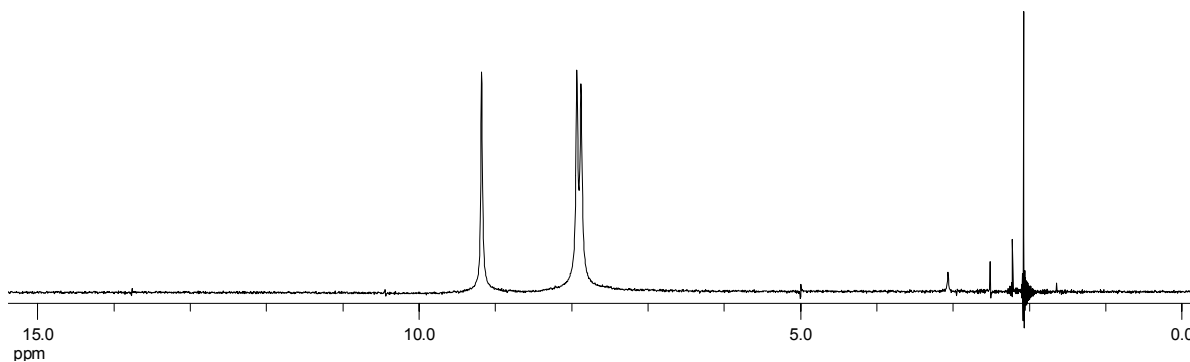

**Fig. S1** <sup>2</sup>H NMR (46 MHz) [BMI]-*d*<sub>3</sub>.NTf<sub>2</sub> in acetone at room temperature (the signal at around 3 ppm is probably HDO).

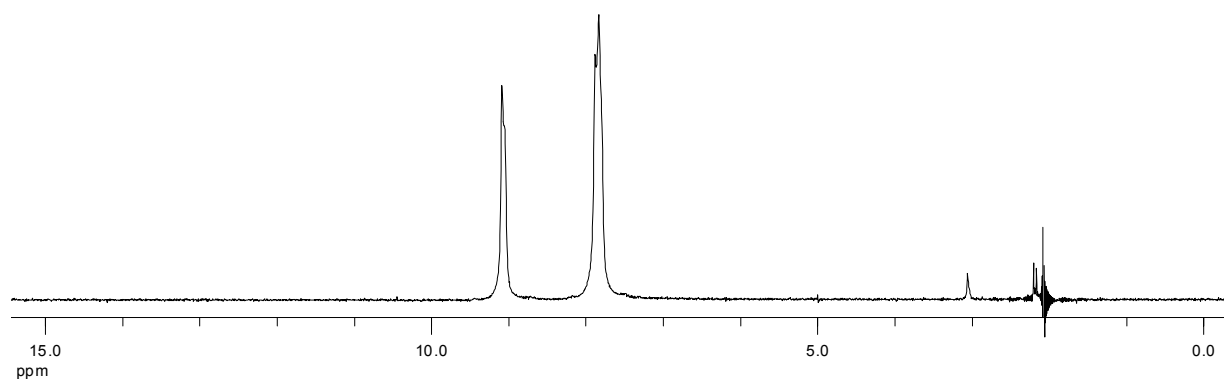

**Fig. S2** <sup>2</sup>H NMR (46 MHz) [BMI]-*d*<sub>3</sub>.PF<sub>6</sub> in acetone at room temperature (the signal at around 3 ppm is probably HDO).

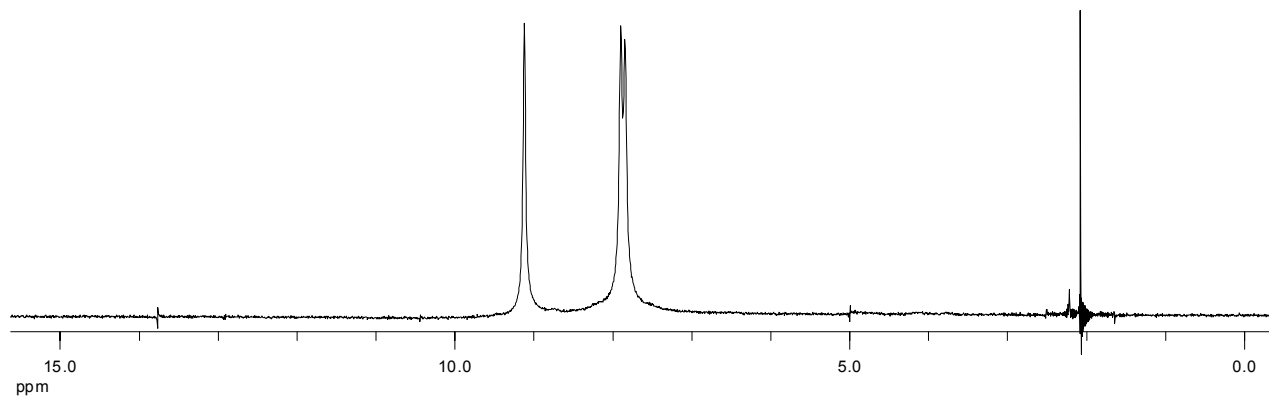

**Fig. S3**  $^2\text{H}$  NMR (46 MHz) [BMI]- $d_3$ .BF $_4$  in acetone at room temperature.

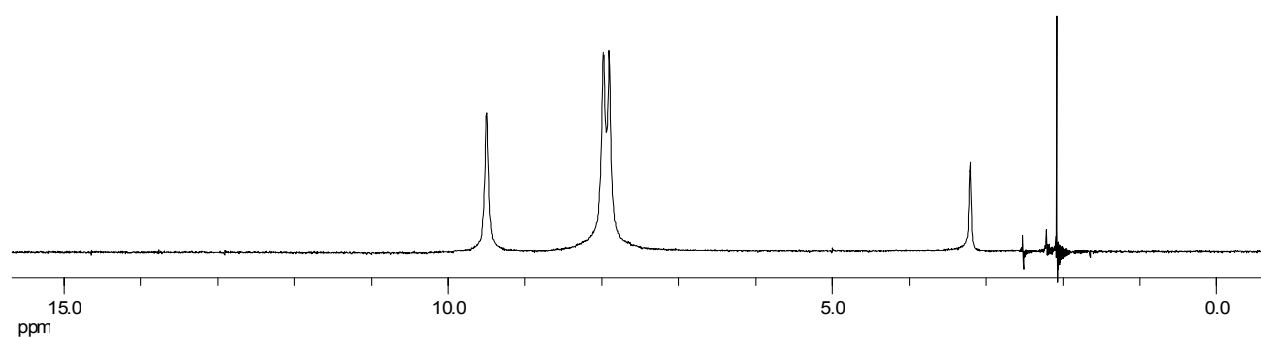

**Fig. S4**  $^2\text{H}$  NMR (46 MHz) [EMI]- $d_3$ .EtSO $_4$  in acetone at room temperature (the signal at around 3 ppm is probably HDO).

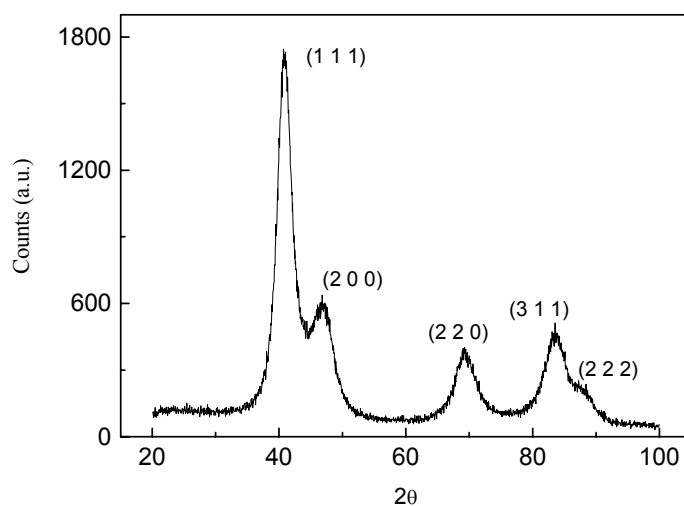

**Fig. S5** XRD (X-ray Diffraction) analysis of the Ir(0) bulk metal.

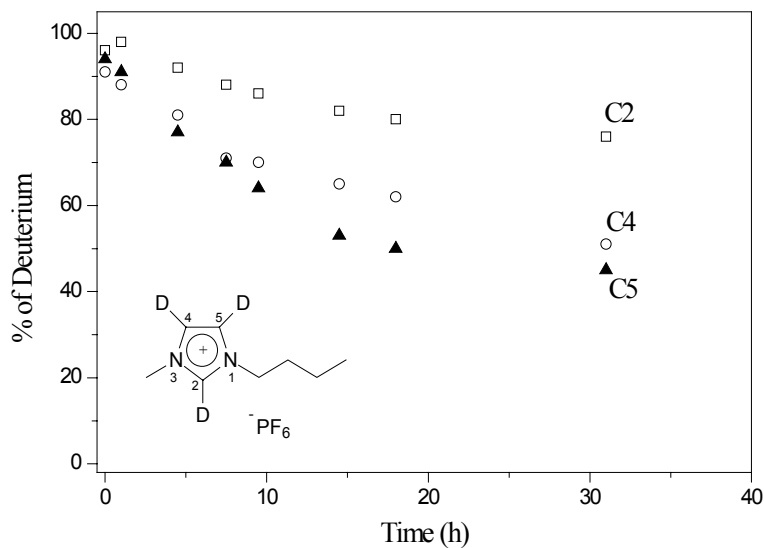

**Fig. S6** D/H exchange observed in the experiment involving the cyclohexene (1.06 g) hydrogenation by  $[\text{Ir}(\text{COD})\text{Cl}]_2$  (0.0174 g) dispersed in  $[\text{BMI}]_d\text{-d}_3.\text{PF}_6$  (1.0 mL, 96% D at C2 and 93% D at C4+C5) at 75°C under 5 atm (constant pressure).

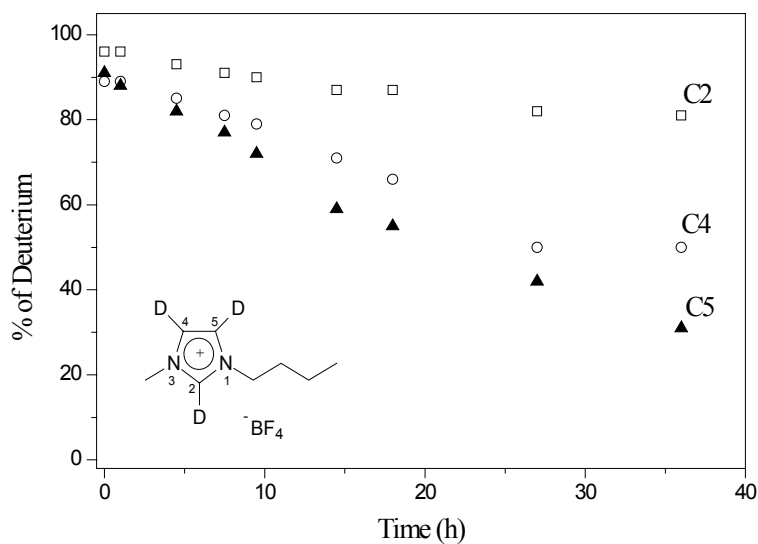

**Fig. S7** D/H exchange observed in the experiment involving the cyclohexene (1.06 g) hydrogenation by  $[\text{Ir}(\text{COD})\text{Cl}]_2$  (0.0174 g) dispersed in  $[\text{BMI}]_d\text{-d}_3.\text{BF}_4$  (1.0 mL, 96% D at C2 and 90% D at C4+C5) at 75°C under 5 atm (constant pressure).

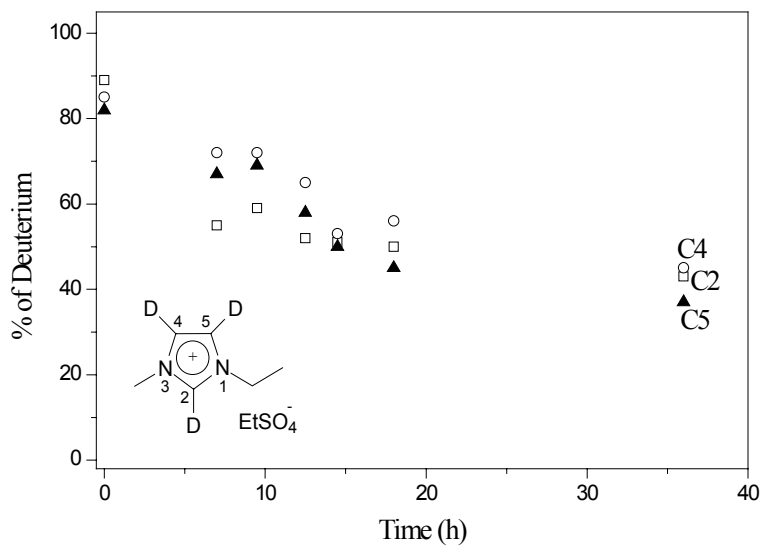

**Fig. S8** D/H exchange observed in the experiment involving the cyclohexene (1.06 g) hydrogenation by  $[\text{Ir}(\text{COD})\text{Cl}]_2$  (0.0174 g) dispersed in  $[\text{EMI}]\text{-}d_3\text{.EtSO}_4$  (1.0 mL, 89% D at C2 and 84% D at C4+C5) at 75°C under 5 atm (constant pressure).

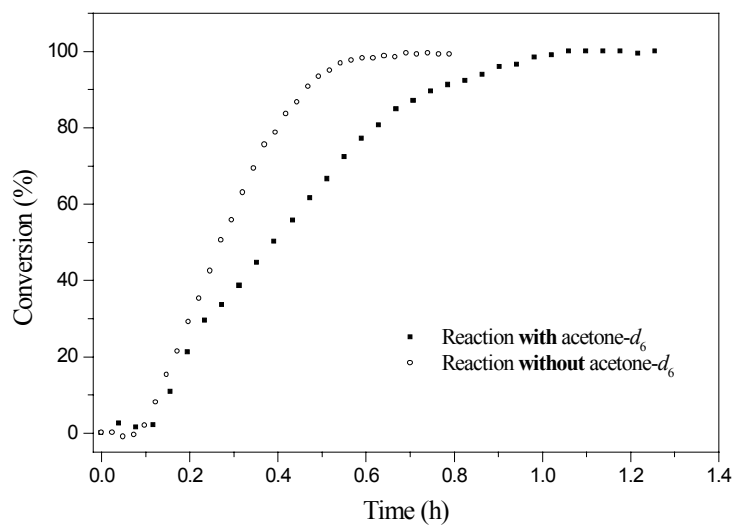

**Fig. S9** Cyclohexene (1.06 g) hydrogenation by  $[\text{Ir}(\text{COD})\text{Cl}]_2$  (0.0174 g) dispersed in  $[\text{BMI}]\text{-}d_3\text{.NTf}_2$  (1.0 mL) and in  $[\text{BMI}]\text{-}d_3\text{.NTf}_2$  (1.0 mL) plus acetone- $d_6$  (1.5 mL) at 75°C under 5 atm (constant pressure).

**Table S1** D/H exchange observed in the experiment **without** cyclohexene with  $[\text{Ir}(0)]_n$  nanoparticles (0.004 g) re-dispersed in  $[\text{BMI}]_n\text{-}d_3\text{.NTf}_2$  (0.4 mL) at 75°C under 5 atm (constant pressure).

| Time (h) | % of D/H exchange at C2 | % of D/H exchange at C4+C5 |
|----------|-------------------------|----------------------------|
| 1.0      | -----                   | 12                         |
| 2.5      | 1                       | 15                         |
| 5.5      | 2                       | 24                         |
| 20.5     | 7                       | 42                         |

**Table S2** D/H exchange observed in the experiment involving the cyclohexene (1.06 g) hydrogenation by  $[\text{Ir}(\text{COD})\text{Cl}]_2$  (0.0174 g) dispersed in  $[\text{BDMI}]_n\text{-}d_5\text{.NTf}_2$  (1.0 mL) at 75°C under 5 atm (constant pressure).

| Time (h)         | % of D/H exchange at C2-CD <sub>3</sub> | % of D/H exchange at C4+C5 |
|------------------|-----------------------------------------|----------------------------|
| 1.0 <sup>a</sup> | -----                                   | -----                      |
| 4.5              | -----                                   | 7                          |
| 7.5              | -----                                   | 10                         |
| 23.5             | -----                                   | 19                         |

<sup>a</sup> Time for total substrate conversion.

**Table S3** Mercury poisoning test using  $[\text{Ir}(\text{COD})(\text{PCy}_3)(\text{py})]\text{PF}_6$  as catalytic precursor in cyclohexene hydrogenation. Reaction conditions:  $[\text{Ir}(\text{COD})(\text{PCy}_3)(\text{py})]\text{PF}_6$  (0.010 g; 0.013 mmol),  $[\text{BMI}]_n\text{-}d_3\text{.NTf}_2$  (0.25 mL), cyclohexene (0.27 g; 3.25 mmol), 75°C and molecular hydrogen (5 atm, constant pressure). After around 59% of cyclohexene conversion, Hg(0) (0.78 g; 3.9 mmol) was added.

| Time (h)         | D/H exchange at C2 position (%) | D/H exchange at C4+C5 positions (%) |
|------------------|---------------------------------|-------------------------------------|
| 0.3 <sup>a</sup> | -----                           | -----                               |
| 2.5 <sup>b</sup> | 4                               | 1                                   |
| 4.4              | 10                              | 2                                   |
| 7.3              | 16                              | 5                                   |
| 18.3             | 23                              | 11                                  |

<sup>a</sup> Conversion of 59%; <sup>b</sup> Total conversion was observed.

**Table S4** D/H exchange observed in the experiment involving the cyclohexene (1.06 g) hydrogenation by  $[\text{Ir}(\text{COD})\text{Cl}]_2$  (0.0174 g) dispersed in  $[\text{BMI}]-d_3.\text{NTf}_2$  (1.0 mL) and acetone- $d_6$  (1.5 mL) at 75°C under 5 atm (constant pressure).

| Time (h)          | % of D/H<br>exchange at C2 | % of D/H<br>exchange at C4+C5 |
|-------------------|----------------------------|-------------------------------|
| 1.3 <sup>a</sup>  | ----                       | 1                             |
| 3.0               | 5                          | 13                            |
| 5.5               | 12                         | 22                            |
| 44.5 <sup>b</sup> | 44                         | 56                            |

<sup>a</sup> Time for total cyclohexene conversion. <sup>b</sup> Total conversion of acetone- $d_6$  was observed.

**Table S5** D/H exchange observed in the experiment involving the cyclohexene (1.0 mL) hydrogenation by  $[\text{Ir}(\text{COD})\text{Cl}]_2$  (0.007 g) dispersed in  $[\text{BMI}]-d_3.\text{NTf}_2$  (0.3 mL) at 30°C under 5 atm (constant pressure).

| Time (h) | % of D/H<br>exchange at C2 | % of D/H<br>exchange at C4+C5 |
|----------|----------------------------|-------------------------------|
| 22.0     | 6                          | 19                            |

Time for total substrate conversion: 4.4 h

**Table S6** D/H exchange observed in the experiment involving the cyclohexene (1.0 mL) hydrogenation by  $[\text{Ir}(0)]_n$  nanoparticles (0.004 g) re-dispersed in  $[\text{BMI}]-d_3.\text{NTf}_2$  (0.3 mL) at 30°C under 5 atm (constant pressure).

| Time (h) | % of D/H<br>exchange at C2 | % of D/H<br>exchange at C4+C5 |
|----------|----------------------------|-------------------------------|
| 22.0     | 5                          | 9                             |

Time for total substrate conversion: 12.4 h

**Table S7** D/H exchange observed in the experiment involving the cyclohexene (1.0 mL) hydrogenation by  $[\text{Ir}(\text{COD})\text{Cl}]_2$  (0.007 g) dispersed in  $[\text{BMI}]-d_3.\text{NTf}_2$  (0.3 mL),  $\text{PS}^{\text{TM}}$  (0.002 g) and acetone- $d_6$  (1.5 mL) at 30°C under 5 atm (constant pressure).

| Time (h) | % of D/H<br>exchange at C2 | % of D/H<br>exchange at C4+C5 |
|----------|----------------------------|-------------------------------|
| 22.0     | 12                         | ----                          |

Time for total substrate conversion: 6.4 h

**Table S8** D/H exchange observed in the experiment involving the cyclohexene (1.0 mL) hydrogenation by  $[\text{Ir}(\text{COD})\text{Cl}]_2$  (0.007 g) dispersed in  $[\text{BMI}]-d_3\cdot\text{NTf}_2$  (0.3 mL) and  $\text{PS}^{\text{TM}}$  (0.002 g) at 30°C under 5 atm (constant pressure).

| Time (h) | % of D/H<br>exchange at C2 | % of D/H<br>exchange at C4+C5 |
|----------|----------------------------|-------------------------------|
| 22.0     | 9                          | 7                             |

Time for total substrate conversion: 8.2 h
